# Supplementary material
Source: Springer Nature journal article supplement (https://www.springermedizin.de/resource/supplementary/12885_2014_4557_MOESM3_ESM.pdf/9466626)

■ Responders ■ Non-responders

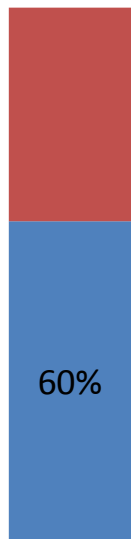

H/H (N=10)

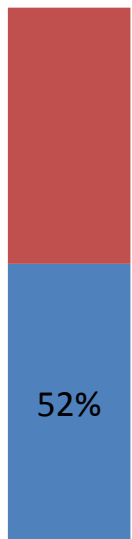

H/R (N= 25)

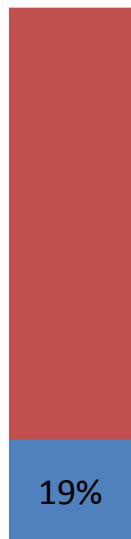

R/R (N = 21)

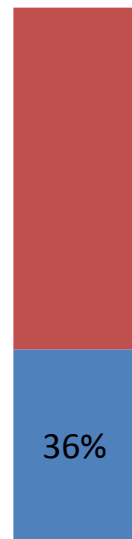

H/H (N = 28)

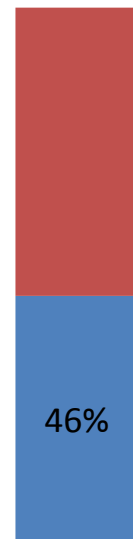

H/R (N = 57)

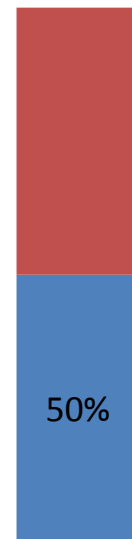

R/R (N = 28)

**FLOX**

**FLOX + cetuximab**

Supplement: MOESM3 [file 9466626]
